# Supplementary material for: Phylogenetic relationship and virulence inference of Streptococcus Anginosus Group: curated annotation and whole-genome comparative analysis support distinct species designation
Source: PubMed Central journal article supplement (PMC3897883; doi:10.1186/1471-2164-14-895), 2013-12-17

SAW C238

SAW CCUG39159

SAA 62CV

SAA F0211

SAA SK1138

SAA C1051

SAA SK52T

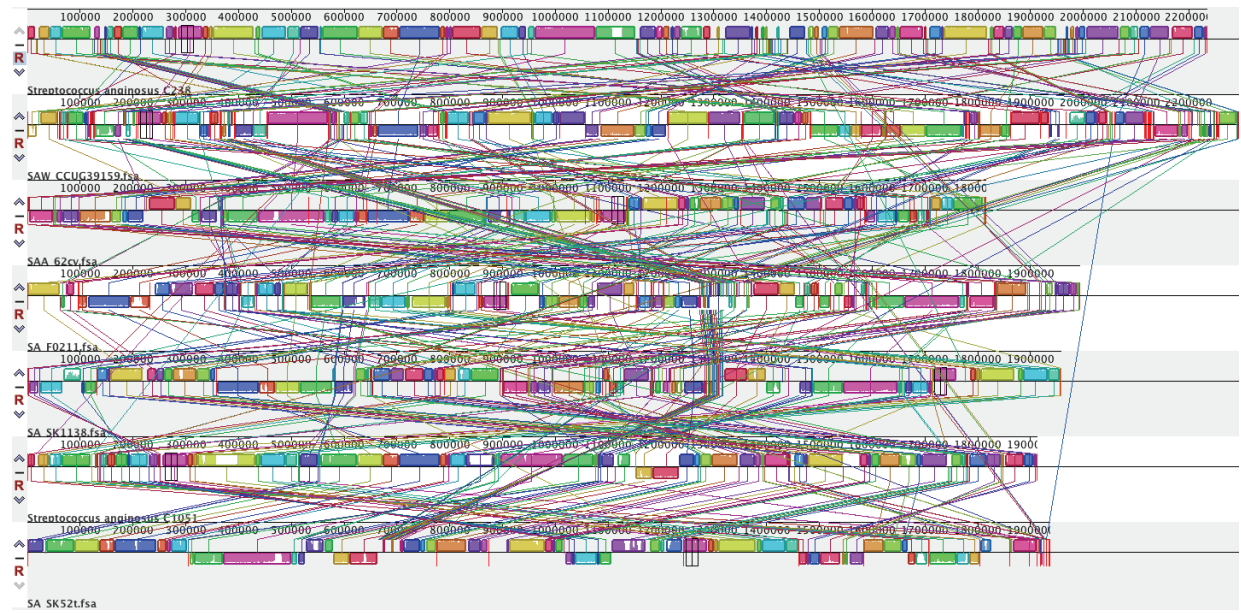

SCP C232

SCP C818

SCP C1050

SCP SK1060

SCC SK53T

SCC F0395

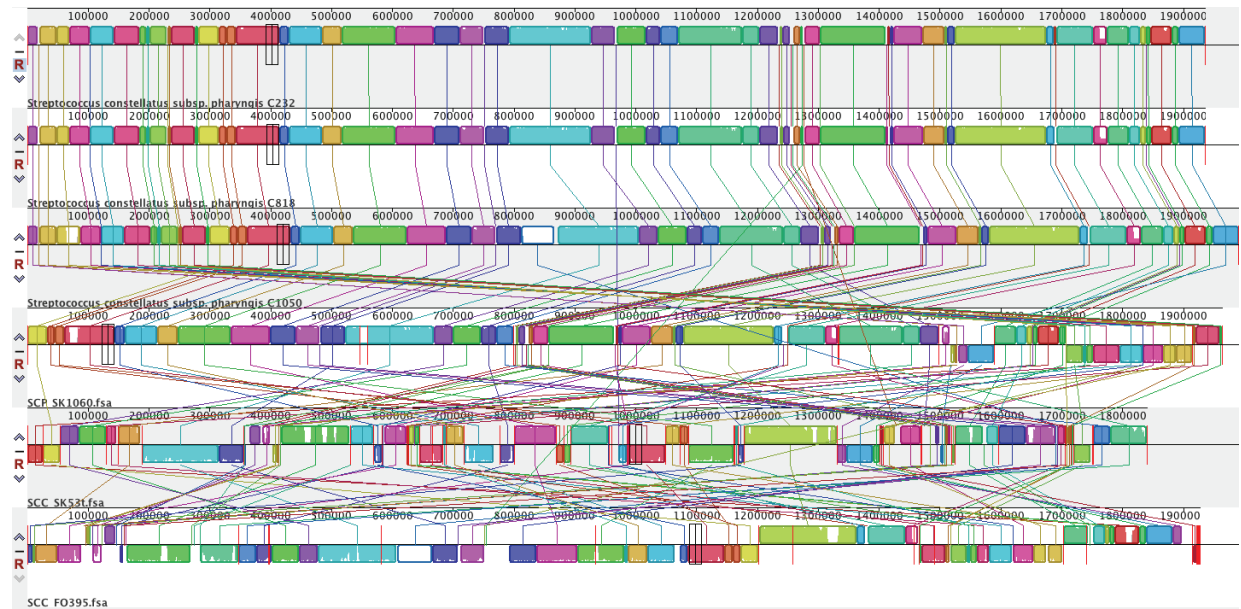

SI B196

SI C270

SI F0413

SI JTH08

SI SK54T

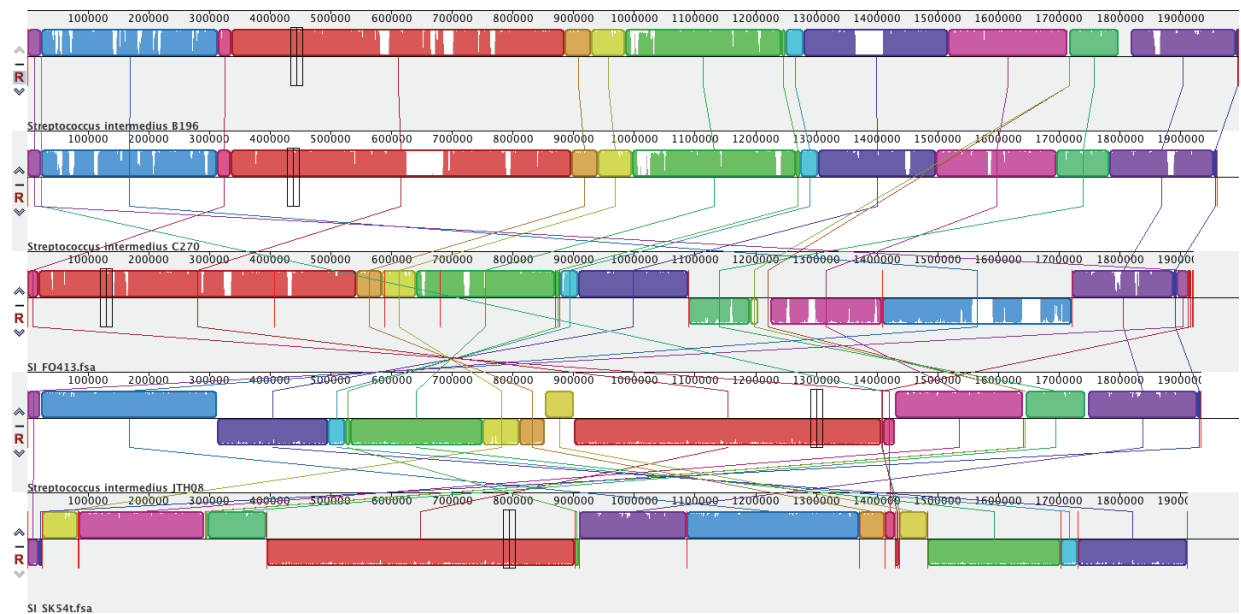

Supplement: 1471-2164-14-895-S2.pdf [file 1471-2164-14-895-S2.pdf]
